1

## 2 **Determinants of anemia among pregnant women in northern Ghana**

3

4 Martin N. Adokiya<sup>1,3\*</sup>, Richmond Aryeetey<sup>2</sup>, Monica Yost<sup>3</sup>, Andrew D. Jones<sup>4</sup>, Mark L. Wilson<sup>3</sup>

5

### 6 **Affiliations:**

7 <sup>1</sup>Department of Public Health, School of Allied Health Sciences, University for Development Studies, Ghana;

8 <sup>2</sup>Department of Population, Family and Reproductive Health, School of Public Health, University of Ghana,

9 Legon, Accra, Ghana

10 <sup>3</sup>Department of Epidemiology, School of Public Health, University of Michigan, Ann Arbor, United States of

11 America;

12 <sup>4</sup>Department of Nutritional Sciences, School of Public Health, University of Michigan, Ann Arbor, United States

13 of America

14

### 15 **Corresponding author**

16 Email: [mnyaaba11@uds.edu.gh](mailto:mnyaaba11@uds.edu.gh) (MNA)

17

18 **Running Head:** Anemia in third trimester of pregnancy in northern Ghana

19 **Funding:** Funded under grant (D43TW009353) through the Fogarty International Center of the US National

20 Institutes of Health.

21 **Financial Disclosure:** The authors have no financial relationships to this article to disclose.

22 **Conflict of Interest:** The authors have no conflicts of interest relevant to this article to disclose.

## 23 **Abbreviations**

|    |        |                                              |
|----|--------|----------------------------------------------|
| 24 | ANC    | Antenatal Care                               |
| 25 | aOR    | Adjusted Odds Ratio                          |
| 26 | CI     | Confidence Interval                          |
| 27 | DHS    | Demographic and Health Survey                |
| 28 | FAO    | Food and Agricultural Organization           |
| 29 | GDP    | Gross Domestic Product                       |
| 30 | GHS    | Ghana Health Service                         |
| 31 | GHS    | Ghana Cedis                                  |
| 32 | GHSERC | Ghana Health Service Ethics Review Committee |
| 33 | Hb     | Hemoglobin                                   |
| 34 | HC     | Health Centre                                |
| 35 | HF     | Health Facility                              |
| 36 | HIV    | Human Immuno-Deficiency Virus                |
| 37 | IPT    | Intermittent Preventive Treatment            |
| 38 | ITN    | Insecticide Treated Mosquito Net             |
| 39 | MDD-W  | Minimum Dietary Diversity for Women          |
| 40 | OR     | Odds Ratio                                   |
| 41 | PCA    | Principal Component Analysis                 |
| 42 | RCH    | Reproductive and Child Health                |
| 43 | TB     | Tuberculosis                                 |
| 44 | USD    | United State Dollars                         |

## 1 **ABSTRACT**

2 Anemia is a global public health issue affecting half of all pregnant women in developing countries. In  
3 2014, 42% of Ghanaian pregnant women aged 15-49 years were anemic ( $<11.0\text{g/dl}$ ) but information  
4 on the determinants of anemia, particularly dietary diversity during the critical third trimester of  
5 pregnancy is limited. We assessed the association between determinants and anemia among pregnant  
6 women in northern Ghana.

7 We employed a cross-sectional design involving 624 pregnant women ( $\geq 20$  weeks of gestation)  
8 attending four antenatal care (ANC) health facilities  $\sim 25$  kilometres north of Tamale, Ghana between  
9 July and August 2017. Hemoglobin concentration (measured using Hemocue HB 301) was classified  
10 as severe, moderate, or mild. Other data included socio-demographic characteristics, malaria  
11 prevention, deworming, and iron/folate tablet use. The FAO Minimum Dietary Diversity (MDD-W)  
12 metric was used to categorize women into “inadequate” (MDD-W  $< 5$  food groups) and “adequate”  
13 (MDD-W  $\geq 5$ ). Logistic regression models were used to determine the association between  
14 moderate/severe anemia (Hb  $< 9.0\text{g/dl}$ ) and mild anemia ( $9.0\text{-}10.9\text{g/dl}$ ), or with ‘no anemia’ ( $\geq 11.0\text{g/dl}$ )  
15 using STATA 14 software.

16 Of 624 women sampled, hemoglobin data were available for 601. The mean age was  $27.81 \pm 0.25$  years,  
17 gestational age was  $31.93 \pm 0.13$  weeks, ANC attendance was  $3.89 \pm 0.07$ ; Hb concentration was  
18  $9.73\text{g/dl} \pm 0.07$ , and MDD-W index for ten food groups was  $5.33 \pm 0.04$ . Anemia (Hb  $< 11.0\text{g/dl}$ ) was  
19 observed in 74.8% of women (moderate/severe anemia=33.4% and mild anemia=41.4%). Using  
20 adjusted logistic regression, women who received deworming medication had lesser odds of being  
21 moderate/severe anemic (aOR=0.51, P=0.021). While women who were engaged in other occupation  
22 (herdsmen) and no previous parity had higher odds of being moderate/severe anemic (aOR=2.90,  
23 P=0.042) and (aOR=2.13, P=0.004) respectively. Moderate/severe anemia was not statistically  
24 associated with MDD-W, nor with socioeconomic status/wealth index. Conclusion, anemia in

25 pregnancy was nearly twice that of Ghana as a whole. Deworming medication was found to be  
26 protective intervention for anemia during pregnancy.

27 **Key words:** Anemia, malaria, Diet Diversity, Pregnancy, Ghana

28

## 29 INTRODUCTION

30

31 Anemia is characterized by low blood hemoglobin (Hb) concentration and constitutes an  
32 important public health problem globally. Anemia has both short- and long-term consequences such as  
33 preterm, low birth weight, morbidity and mortality <sup>1,2,3,4</sup>. In 2016, World Health Organization (WHO)  
34 estimated that anemia affected 38.2% of pregnant women globally, with the highest prevalence in  
35 South-East Asia (48.7%) and Africa (46.3%) <sup>5,6</sup>. Anemia affects about 1.62 billion people, 56 million  
36 of whom are pregnant women <sup>5</sup>. An estimated 800,000 pregnant women globally have severe anemia  
37 (Hb<7.0g/dl). In Ghana, a national Demographic and Health Survey in 2014 determined that 42% of  
38 pregnant women were anemic compared to 70% in rural parts of the country <sup>7</sup>.

39 Anemia often results from decreased red blood cell production or increased destruction/loss <sup>3</sup>.  
40 Causes include environmental, behavioral, and social factors <sup>8</sup> that limit adequate nutrient intake and  
41 absorption, or exposure to infectious diseases. In addition, anemia risk is related to household-level  
42 factors such as access to water and sanitation, availability of health services, access to diverse food  
43 sources, use of insecticide treated nets (ITNs) and knowledge about anemia prevention. Other  
44 household- or community-level factors include socioeconomic status, culture, wealth status and  
45 education attainment <sup>5,9,8</sup>.

46 In developing countries, pregnant women often start gestation with depleted or low body iron  
47 stores, making them especially vulnerable to iron deficiency anemia <sup>6,10,11,12</sup>. Hb concentration declines  
48 during pregnancy, partly because of expanded plasma volume compared to red cell mass <sup>10,13</sup>. This is

49 influenced partly by the iron status of the pregnant woman,<sup>12</sup> representing a major public health  
50 problem in sub-Saharan Africa <sup>9,10</sup>. Another contributor to anemia is parasitic infections/infestation  
51 such as malaria, hookworm and schistosomiasis, especially in areas of Ghana where these infections  
52 are endemic <sup>5</sup>. In addition, chronic infections such as tuberculosis (TB) and human immune-deficiency  
53 virus (HIV) increase risk of anemia <sup>5</sup>. This condition may lead to premature delivery, intrauterine  
54 growth retardation, and increased risk of malnutrition, morbidity and mortality for the mother, growing  
55 fetus and newborn <sup>10,11,14</sup>.

56 Poor maternal diet during preconception and pregnancy is a major contributor to adverse  
57 pregnancy outcome such as preterm, low birth weight, still birth and mortality. Diets of pregnant  
58 women in developing countries are often limited to a few plant-based foods, with little consumption of  
59 micronutrient-dense animal-source foods, or diverse fruits and vegetables <sup>13,15</sup>. Poor dietary intake and  
60 low iron bioavailability are key determinants of low iron reserves and anemia <sup>16</sup>, particularly with little  
61 dietary diversity among poor populations <sup>17</sup>, who consume mainly carbohydrates with little or no  
62 animal products, fruits and vegetables <sup>10,18</sup>. Little is known about diet and anemia among pregnant  
63 women in Ghana. Our study focused on northern Ghanaian women at high-risk of anemia in their third  
64 trimester of pregnancy <sup>7</sup>. We aimed to assess the association between determinants, particularly dietary  
65 diversity and moderate/severe anemia, with the hypothesis that, greater dietary diversity would be  
66 associated with lower anemia risk.

67

## 68 **Materials and methods**

### 69 **Study Area/Design**

70 Ghana is a West African nation of 29 million people who are mostly concentrated in the  
71 southern and coastal regions. Economically, Ghana ranks in the top third of African nations  
72 (GDP/capita = US\$ 4,600), with considerable geographic variation in wealth. Our study was conducted

73 in Northern Region, a poorer, predominantly agricultural area, made up of 28 Districts and  
74 Municipalities. Four government antenatal care (ANC) health facilities in Savelugu Municipality,  
75 located ~ 25 kilometres north of Tamale, served as the source of the study women. We employed a  
76 cross-sectional design involving pregnant women ( $\geq 20$  weeks of gestation) seeking ANC, using our  
77 own questionnaire and ANC medical record data to identify risk factors of anemia. The study was  
78 undertaken during July-August 2017 (rainy season), using a questionnaire that had been pre-tested at a  
79 nearby health center.

80

## 81 **Study population and protection of human subjects**

82 Data were collected from pregnant women attending health facilities in the North, South,  
83 East and West quadrants of the Municipality. One health facility (HF) was randomly selected in the  
84 South (Janjori Kukuo Health Centre) to pre-test the tools/questionnaire. Then, a HF was randomly  
85 selected from each of the remaining three quadrants: Moglaa Health Centre (West), Savelugu  
86 Reproductive and Child Health (East) and Pong Tamale Health Centre (North). The fourth HF sampled  
87 was Savelugu Hospital, a major referral and health-seeking hospital centrally located in the  
88 Municipality that serves many ANC-seeking women. During the ANC days of the four HFs, pregnant  
89 women were recruited following informed consent. Women attending the ANC were informed of the  
90 study in the native language, Dagbani, by a member of the study team. Women were eligible to  
91 participate if they were at the HF to receive ANC, pregnant with a gestational age of at least 20 weeks,  
92 18 or more years of age, and had not been diagnosed with sickle cell anemia. The maternal records of  
93 interested pregnant women were examined for compliance to these inclusion criteria. For eligible  
94 women, a sticker with a unique identification number was placed on their maternal record book and  
95 they were invited to stay for an interview. The women were then seen one-on-one with a trained  
96 interviewer who explained the details of the study, including risks and benefits. Women who agreed to

97 participate gave their consent via thumb print, and were then provided with a signed copy of their  
98 consent form in English, as the native language is not commonly written, and many people are illiterate.

99 The study protocol was approved before its implementation by the Ghana Health Service  
100 Ethical Review Committee (GHSERC/12/05/17) and the University of Michigan Institutional Review  
101 Board for Health Sciences and Behavioral Sciences (HUM00128583). Additionally, official approval  
102 letters were obtained from the Regional Director and District Director of Ghana Health Service in  
103 Northern Region and Savelugu Municipality, respectively, as well as heads of the four HFs.

104

### 105 **Data sources and derived variables:**

106 Data were gathered from oral interviews using a pretested questionnaire, and from the ANC  
107 record of each woman. The outcome of interest was the pregnant woman's anemia status. ANC is  
108 mostly free to pregnant women in Ghana, and provides various interventions and preventative care to  
109 combat anemia and infections <sup>7</sup>. Public health service procedures ensure all pregnant women have their  
110 hemoglobin tested to monitor anemia during each ANC visit, and receive iron supplementation,  
111 intermittent preventive treatment of malaria during pregnancy (IPTp), deworming medication,  
112 insecticide treated bed nets (ITN), and education about diet and malaria prevention <sup>7</sup>. While these  
113 services are, in theory, widely available to all pregnant women, there are many factors influencing  
114 whether a woman actually receives this care. Even though the ANC services are free, the transportation  
115 to the clinic is not. Some women have to walk for many miles to reach the nearest ANC center. Rural  
116 health centers are often poorly staffed and poorly supplied with materials and medications needed for  
117 the services. Additionally, attending ANC may mean the loss of a day's income, which may not be  
118 possible for lower-income women. Despite these challenges, a recent study reported that 97% of  
119 pregnant Ghanaian women attended at least one ANC visit in 2014, and 87% had attended four or more  
120 visits <sup>7</sup>. In the Northern Region where our study occurred, ANC attendance is likely to be lower due to

121 lower income and fewer health centers. Even with high ANC attendance, anemia remains a major  
122 problem for adult women in many regions of Ghana, particularly in areas like our study sites where  
123 poverty levels are high, and access to health centers is hindered <sup>7</sup>.

124 The interviews were conducted by trained local research assistants with health education  
125 backgrounds (e.g. Bachelor of Science degree in Nursing or Community Nutrition). Each hired research  
126 assistant was fluent in the Dagbani and English languages, as well as other local native Ghanaian  
127 languages. The interviews were conducted in a private room or area of the HF to protect women's  
128 privacy. Individual women were asked questions concerning their demographic situation, as well as  
129 characteristics of their housing, water, toilets, and household assets. In addition, they were asked about  
130 the ANC services they had received, and were administered a 24-hour dietary recall survey, collecting  
131 information on all food items and beverages consumed in the previous day. Interviewers asked  
132 individual women to recall all foods they had consumed in the previous 24-hour, and after responding  
133 were probed to ensure that no meal or snack was left out (breakfast, snack before lunch, lunch, snack  
134 after lunch, dinner and snack before going to bed). The foods were then categorized into ten (10) food  
135 groups <sup>19</sup>. Information on Hb concentration, and gestation, were extracted from the maternal health  
136 records that are kept for each pregnant woman.

137 Hb concentration determination differed between the HFs. The Savelugu hospital used a  
138 spectrophotometer operated by trained laboratory scientist/technicians. The three health centers used a  
139 Hemocue HB 301 operated by HF workers. A blood sample for Hb concentration was taken on the day  
140 of the interview in most cases, but for very few participants this occurred one week after the interview.

141 Our study used results from tests that are routinely conducted at ANC visits, as recommended  
142 by the Government of Ghana. All tests were performed by HF staff. Occasionally, tests were not  
143 performed on the day of interview due to shortages of supplies. However, tests for these women were  
144 completed in the following weeks if they returned to the same HF. Overall, 27 women did not return



145 for testing. After completing the interview and data extraction, participants were given GHS10.00 (US\$  
146 2.27) to compensate them for transportation back to their homes.

147

## 148 **Statistical analysis:**

149 Data were cleaned and analyzed using STATA 14 software. Frequency tables were generated  
150 to describe the distribution of anemia status and all hypothesized explanatory variables. Logistic  
151 regression was performed to determine the unadjusted associations between anemia status and each  
152 independent explanatory variable. Adjusted logistic regression analyses were performed to evaluate  
153 relationships among independent factors and anemia status. As with the Demographic and Health  
154 Survey's (DHS) classification scheme, we defined anemia as severe ( $Hb < 7.0\text{g/dl}$ ), moderate ( $Hb = 7.0\text{-}$   
155  $8.9\text{g/dl}$ ), or mild ( $Hb = 9.0\text{-}10.9\text{g/dl}$ ), with no anemia being  $Hb \geq 11.0\text{g/dl}$ . This cut-off was selected in  
156 accordance with the Demographic and Health Survey for Ghana and previous studies of anemia in  
157 pregnant women<sup>3,7,10</sup>. For our study, severe and moderate anemia were combined (moderate/severe)  
158 as  $Hb < 9.0\text{g/dl}$ , and analyzed in comparison with mild/no anemia. Anemia prevalence was analyzed  
159 for the entire study population, as well as for each HF, using logistic regression tests to evaluate risk  
160 factor associations.

161 Dietary diversity was calculated using the reported number of different food groups consumed  
162 by each woman in the previous 24 hours. Food was reclassified into ten distinct food groups: (1) grains,  
163 roots and tubers, (2) Pulses-beans, peas and lentils, (3) Nuts and seeds, (4) Dairy, (5) Meat, poultry and  
164 fish, (6) Eggs, (7) Dark green leafy vegetables, (8) Vitamin A-rich fruits and vegetables, (9) Other  
165 vegetables and (10) Other fruits. These mutually exclusive food groups are those that comprise the  
166 FAO Minimum Dietary Diversity for Women (MDD-W) indicator<sup>19</sup>. The FAO MDD-W metric was  
167 used to categorize participants into "inadequate" ( $MDD-W < 5$  food groups) and "adequate" ( $MDD-W$   
168  $\geq 5$ ). A wealth index was calculated using Principal Component Analysis (PCA) of household assets,

169 housing conditions, water facilities and toilet facilities. Other risk factors that were analyzed included  
170 maternal education, religion, ethnicity, and occupation as well as socio-demographic characteristics,  
171 ANC attendance, parity, ITN ownership and ITN utilization. The relation between each individual risk  
172 factor and moderate/severe anemia was determined using bivariate logistic regression to obtain the  
173 odds ratios (ORs), confidence intervals (CIs) and probability values (p-value) for the whole sample.  
174 Separate adjusted logistic regression models were constructed for the whole sample using ten (10)  
175 selected risk factors with a significance test level of  $\alpha = 0.05$ . Odds ratios were used to interpret  
176 the associations of risk factors with moderate/severe or mild anemia/no anemia.

177

## 178 RESULTS

### 179 Study population characteristics:

180 In total, 624 pregnant women at  $\geq 20$  weeks of gestation were enrolled, but analysis was limited  
181 to 601 participants (96.3%) for whom Hb measurements were available (**Table 1**). The mean age was  
182 27.81 ( $\pm 0.25$ ) years, with gestation age = 31.93 ( $\pm 0.13$ ), ANC = 3.89 ( $\pm 0.07$ ), Hb = 9.73 ( $\pm 0.07$ ) and  
183 MDD-W = 5.33 ( $\pm 0.04$ ). More than half (58%) of the participants who received ANC services at the  
184 Savelugu Hospital and 53% were between 20 and 29 years old. Nearly all women (96%) were from the  
185 Dagomba ethnic group. Three-quarters (75%) had no formal education, and nearly all (97%) belonged  
186 to the Islamic religion, with 98% being married (monogamous or polygamous marriages). About 69%  
187 of the participants were either farmers (39%) or petty traders (30%), while very few (2%) were salaried  
188 workers. Most women (91%) were between 28 and 36 weeks of gestation when interviewed, while  
189 very few (2%) were between 20 and 27 weeks of gestation. Approximately 92% of the participants had  
190 access to improved water sources and about one-quarter (24%) reported using improved toilet facilities.

191 About 85% of the participants achieved the MDD-W indicator, that is, consumed five or more  
192 food groups in the previous 24 hours. In addition, 91% of the participants reported household

193 ownership of at least one ITN, with 83% having slept under an ITN on the night preceding the  
194 interview. About three-quarters (76%) of the participants had previously delivered live babies. While  
195 52% had attended  $\geq 4$  ANC visits and 84% received at least one IPTp treatment, only 14% received any  
196 deworming medication. In addition, 99% of the participants reported they had received iron and folic  
197 acid tablets during ANC visits.

198

### 199 **Prevalence of moderate/severe anemia and risk factors**

200 Three-quarters (75%) of the pregnant women in the study were anemic with 41% experiencing  
201 mild anemia and 33% experiencing moderate/severe anemia. Forty-one percent of participants who  
202 were  $< 20$  years of age had moderate/severe anemia. Anemia prevalence declined with increasing age.  
203 Moderate/severe anemia was least prevalent among salaried workers (29%) and petty traders (30%),  
204 but highest among unemployed (41%) and others, such as herdsmen (63%).

205 Nearly half (49%) of the participants without household ownership of ITNs were  
206 moderate/severe anemic compared to 32% among those with ITNs. Those who did not sleep under ITN  
207 on the previous night preceding the survey were more likely to experience moderate/severe anemia  
208 (44%) compared to those who slept under an ITN (31%). In addition, 41% of the participants who did  
209 not receive Intermittent Preventive Treatment (IPT) had moderate/severe anemia compared to 32% in  
210 those who did receive IPT.

211 Women with no previous delivery had the greater risk of moderate/severe anemia (48%)  
212 compared to women with at least one previous deliveries. More than a third of pregnant women who  
213 did not receive deworming medication had moderate/severe anemia compared to about one-fifth among  
214 those who did take deworming drugs. Similarly, about 33% of the participants who received iron tablets  
215 or folic acid tablets did not have moderate/severe anemia (**Table 1**).

216 Participants who consumed pulses (41%), dairy (35%), meat, poultry and fish (34%), eggs  
 217 (36%), dark green leafy vegetables (34%), and other vegetables (34%) had greater risk of  
 218 moderate/severe anemia than those who did not. However, participants who consumed nuts/seeds  
 219 (33%), vitamin A-rich fruits and vegetables (20%) and other fruits (30%) were less likely to have  
 220 moderate/severe anemia compared to those who did not consume.

221  
 222 **Table 1: Socio-demographic factors and dietary diversity by anemia status among pregnant women in**  
 223 **northern Ghana (n=601)**  
 224

| Variables                      | Total Sample<br>(N=601) | Moderate/severe<br>anemia<br>(<9.0g/dl) | Mild anemia<br>(9.0-10.9g/dl) | No anemia<br>(≥11.0g/dl) |
|--------------------------------|-------------------------|-----------------------------------------|-------------------------------|--------------------------|
|                                | Frequency (%)           | Frequency (%)                           | Frequency (%)                 | Frequency (%)            |
| <b>Name of Health Facility</b> |                         |                                         |                               |                          |
| Savelugu hospital              | 349(58.1)               | 157(45.0)                               | 108(31.0)                     | 84(24.0)                 |
| Moglaa HC                      | 93(15.5)                | 14(15.0)                                | 54(58.1)                      | 25(26.9)                 |
| Pong Tamale HC                 | 77(12.8)                | 18(23.4)                                | 44(57.1)                      | 15(19.5)                 |
| Savelugu RCH                   | 82(13.6)                | 12(14.6)                                | 43(52.4)                      | 27(33.0)                 |
| <b>Age (in years)</b>          |                         |                                         |                               |                          |
| <20                            | 34(5.7)                 | 14 (41.2)                               | 15(44.1)                      | 5(14.7)                  |
| 20-29                          | 319(53.1)               | 112(35.1)                               | 125(39.2)                     | 82(25.7)                 |
| 30-39                          | 226(37.6)               | 73(32.3)                                | 95(42.0)                      | 58(25.7)                 |
| ≥40                            | 22(3.6)                 | 2(9.1)                                  | 14(63.6)                      | 6 (27.3)                 |
| <b>Ethnicity</b>               |                         |                                         |                               |                          |
| Dagomba                        | 576(96.2)               | 195(33.8)                               | 236 (41.0)                    | 145(25.2)                |
| Fulani                         | 8(1.3)                  | 2(25.0)                                 | 5(62.5)                       | 1(12.5)                  |
| Others (Akan, Ewe etc.)        | 15(2.5)                 | 3(20.0)                                 | 7(46.7)                       | 5(33.3)                  |
| <b>Education status</b>        |                         |                                         |                               |                          |
| None                           | 450(74.9)               | 139(30.9)                               | 204(45.3)                     | 107(23.8)                |
| Primary                        | 46(7.7)                 | 19(41.3)                                | 16(34.8)                      | 11(23.9)                 |
| JSS/Middle School              | 53(8.8)                 | 22(41.5)                                | 15(28.3)                      | 16(30.2)                 |
| Senior Secondary               | 38(6.3)                 | 17(44.7)                                | 11(29.0)                      | 10(26.3)                 |
| Tertiary                       | 14(2.3)                 | 4(28.6)                                 | 3(21.4)                       | 7(50.0)                  |
| <b>Religious denomination</b>  |                         |                                         |                               |                          |
| Islam                          | 582(97.3)               | 196(33.7)                               | 238(40.9)                     | 148(25.4)                |
| Christianity                   | 13(2.2)                 | 4(30.8)                                 | 7(53.8)                       | 2(15.4)                  |
| Traditionalist                 | 3(0.50)                 | 0(0.0)                                  | 2(66.7)                       | 1(33.3)                  |
| <b>Marital status</b>          |                         |                                         |                               |                          |
| Single                         | 12(2.0)                 | 5(41.7)                                 | 7(58.3)                       | 0(0.0)                   |
| Married-monogamous             | 329(54.7)               | 103(31.3)                               | 139(42.3)                     | 87(26.4)                 |
| Married-polygamous             | 260(43.3)               | 93(35.8)                                | 103(39.6)                     | 64(24.6)                 |
| <b>Occupation status</b>       |                         |                                         |                               |                          |
| Farmer                         | 233(38.8)               | 73(31.3)                                | 108(46.4)                     | 52(22.3)                 |
| Petty trader                   | 181(30.1)               | 54(29.9)                                | 73(40.3)                      | 54(29.8)                 |
| Salaried worker                | 14(2.3)                 | 4(28.6)                                 | 4(28.6)                       | 6(42.8)                  |
| Artisan/laborer                | 79(13.1)                | 27(34.2)                                | 34(43.0)                      | 18(22.8)                 |

|                                               |           |           |           |           |
|-----------------------------------------------|-----------|-----------|-----------|-----------|
| No occupation                                 | 75(12.5)  | 31(41.3)  | 27(36.0)  | 17(22.7)  |
| Others                                        | 19(3.2)   | 12(63.2)  | 3(15.8)   | 4(21.0)   |
| <b>Wealth index</b>                           |           |           |           |           |
| Poorest                                       | 118(19.6) | 34(28.8)  | 53(44.9)  | 31(26.3)  |
| Poor                                          | 119(19.8) | 41(37.5)  | 50(42.0)  | 28(23.5)  |
| Medium                                        | 120(20.0) | 45(37.5)  | 51(42.5)  | 24(20.0)  |
| Wealthy                                       | 122(20.3) | 38(31.1)  | 45(36.9)  | 39(32.0)  |
| Wealthiest                                    | 122(20.3) | 43(35.2)  | 50(41.0)  | 29(23.8)  |
| <b>Gestational age (in weeks)</b>             |           |           |           |           |
| 20-27                                         | 11(1.8)   | 4(36.4)   | 4(36.4)   | 3(27.2)   |
| 28-36                                         | 547(91.0) | 182(33.2) | 229(41.9) | 136(24.9) |
| ≥37                                           | 43(7.2)   | 15(34.9)  | 16(37.2)  | 12(27.9)  |
| <b>Drinking water source</b>                  |           |           |           |           |
| Non-improved                                  | 48(8.0)   | 12(25.0)  | 25(52.1)  | 11(22.9)  |
| Improved                                      | 553(92.0) | 189(34.2) | 224(40.5) | 140(25.3) |
| <b>Toilet facility</b>                        |           |           |           |           |
| Non-improved                                  | 457(76.0) | 155(33.9) | 185(40.5) | 117(25.6) |
| Improved                                      | 144(24.0) | 46(31.94) | 64(44.44) | 34(23.61) |
| <b>Grains/roots/tubers/plantain</b>           |           |           |           |           |
| No                                            | 1(0.2)    |           |           |           |
| Yes                                           | 600(99.8) |           |           |           |
| <b>Pulses</b>                                 |           |           |           |           |
| No                                            | 452(75.3) | 139(30.8) | 194(42.9) | 119(26.3) |
| Yes                                           | 148(24.7) | 61(41.2)  | 55(37.2)  | 32(21.6)  |
| <b>Nuts/seeds</b>                             |           |           |           |           |
| No                                            | 133(22.2) | 48(36.1)  | 53(39.8)  | 32(24.1)  |
| Yes                                           | 467(77.8) | 153(32.8) | 195(41.7) | 119(25.5) |
| <b>Dairy</b>                                  |           |           |           |           |
| No                                            | 477(79.4) | 158(33.1) | 197(41.3) | 122(25.6) |
| Yes                                           | 124(20.6) | 43(34.7)  | 52(41.9)  | 29(23.4)  |
| <b>Meat/poultry/fish(amaani)</b>              |           |           |           |           |
| No                                            | 7(1.2)    | 2(28.6)   | 3(42.8)   | 2(28.6)   |
| Yes                                           | 594(98.8) | 199(33.5) | 246(41.4) | 149(25.1) |
| <b>Eggs</b>                                   |           |           |           |           |
| No                                            | 555(92.5) | 185(33.3) | 233(42.0) | 137(24.7) |
| Yes                                           | 45(7.5)   | 16(35.6)  | 16(35.6)  | 13(28.8)  |
| <b>Dark green leafy vegetables</b>            |           |           |           |           |
| No                                            | 40(6.7)   | 10(25.0)  | 22(55.0)  | 8(20.0)   |
| Yes                                           | 561(93.3) | 191(34.0) | 227(40.5) | 143(25.5) |
| <b>Vitamin A-rich fruits &amp; vegetables</b> |           |           |           |           |
| No                                            | 555(92.3) | 192(34.6) | 223(40.2) | 140(25.2) |
| Yes                                           | 46(7.7)   | 9(19.6)   | 26(56.5)  | 11(23.9)  |
| <b>Other vegetables</b>                       |           |           |           |           |
| No                                            | 11(1.8)   | 3(27.3)   | 6(54.5)   | 2(18.2)   |
| Yes                                           | 590(98.2) | 198(33.6) | 243(41.2) | 149(25.2) |
| <b>Other fruits</b>                           |           |           |           |           |
| No                                            | 570(95.0) | 191(33.5) | 234(41.1) | 145(25.4) |
| Yes                                           | 30(5.0)   | 9(30.0)   | 15(50.0)  | 6(20.0)   |
| <b>Minimum dietary diversity score</b>        |           |           |           |           |

|                                       |                     |                       |           |           |
|---------------------------------------|---------------------|-----------------------|-----------|-----------|
| <5                                    | 91(15.1)            | 27(29.7)              | 40(43.9)  | 24(26.4)  |
| ≥5                                    | 510(84.9)           | 174(34.1)             | 209(41.0) | 127(24.9) |
| <b>Household livestock</b>            |                     |                       |           |           |
| No                                    | 116(19.3)           | 36(31.0)              | 45(38.8)  | 35(30.2)  |
| Yes                                   | 485(80.7)           | 165(34.0)             | 204(42.1) | 116(23.9) |
| <b>Household ITN</b>                  |                     |                       |           |           |
| No                                    | 55(9.2)             | 27(49.1)              | 17(30.9)  | 11(20.0)  |
| Yes                                   | 546(90.8)           | 174(31.9)             | 232(42.5) | 140(25.6) |
| <b>Slept under ITN previous night</b> |                     |                       |           |           |
| No                                    | 104(17.3)           | 46(44.2)              | 35(33.7)  | 23(22.1)  |
| Yes                                   | 497(82.7)           | 155(31.2)             | 214(43.1) | 128(25.7) |
| <b>No. of previous deliveries</b>     |                     |                       |           |           |
| 0                                     | 142(23.6)           | 68(47.9)              | 48(33.8)  | 26(18.3)  |
| 1                                     | 122(20.3)           | 40(32.8)              | 54(44.3)  | 28(22.9)  |
| 2-3                                   | 214(35.6)           | 59(27.6)              | 91(42.5)  | 64(29.9)  |
| ≥4                                    | 123(20.5)           | 34(27.7)              | 56(45.5)  | 33(26.8)  |
| <b>Total ANC visits</b>               |                     |                       |           |           |
| < 4                                   | 286(47.6)           | 97(33.9)              | 123(43.0) | 66(23.1)  |
| 4-7                                   | 286(47.6)           | 96(33.6)              | 111(38.8) | 79(27.6)  |
| ≥8                                    | 29(4.8)             | 8(27.6)               | 15(51.7)  | 6(20.7)   |
| <b>IPT received</b>                   |                     |                       |           |           |
| No                                    | 99(16.5)            | 41(41.4)              | 38(38.4)  | 20(20.2)  |
| Yes                                   | 502(83.5)           | 160(31.9)             | 211(42.0) | 131(26.1) |
| <b>Deworming medication</b>           |                     |                       |           |           |
| No                                    | 515(85.7)           | 183(35.5)             | 198(38.5) | 134(26.0) |
| Yes                                   | 86(14.3)            | 18(20.9)              | 51(59.3)  | 17(19.8)  |
| <b>Received iron tablets</b>          |                     |                       |           |           |
| No                                    | 3(0.5)              | 1(33.3)               | 1(33.3)   | 1(33.3)   |
| Yes                                   | 598(99.5)           | 200(33.4)             | 248(41.5) | 150(25.1) |
| <b>Received folic acid</b>            |                     |                       |           |           |
| No                                    | 3(0.5)              | 1(33.3)               | 1(33.3)   | 1(33.3)   |
| Yes                                   | 598(99.5)           | 200(33.4)             | 248(41.5) | 150(25.1) |
| <b>Prevalence of anemia</b>           |                     |                       |           |           |
| Severe-moderate (<9.0g/dl)            | 201(33.5)           |                       |           |           |
| Mild (9.0-10.9g/dl)                   | 249(41.4)           |                       |           |           |
| No anemia                             | 151(25.1)           |                       |           |           |
| <b>Prevalence of anemia types</b>     |                     |                       |           |           |
| Severe (<7.0g/dl)                     | 25(4.2)             |                       |           |           |
| Moderate (7.0-8.9g/dl)                | 175(29.2)           |                       |           |           |
| Mild (9.0-10.9g/dl)                   | 249(41.5)           |                       |           |           |
| No anemia (≥11.0g/dl)                 | 151(25.1)           |                       |           |           |
| <b>Means</b>                          |                     |                       |           |           |
|                                       | <b>Mean (CI)</b>    | <b>Standard Error</b> |           |           |
| Age (in years)                        | 27.81(27.33, 28.29) | 0.246                 |           |           |
| Gestational age (in weeks)            | 31.93(31.68, 32.18) | 0.128                 |           |           |
| Number of ANC visits                  | 3.89(3.76, 4.03)    | 0.070                 |           |           |
| Hemoglobin level                      | 9.73(9.59, 9.88)    | 0.074                 |           |           |
| Minimum Dietary diversity             | 5.33(5.25, 5.42)    | 0.042                 |           |           |

225  
226

## 227 **Analysis of risk factors and any anemia or moderate/severe anemia**

228       When all three levels of anemia were combined (<11.0g/dl) and compared with no anemia using  
229 bivariate (unadjusted) logistic regression (**Table 2**), anemia risk was significantly lower with tertiary  
230 education (**OR=0.31**, 95%CI:0.11, 0.91), and higher with medium wealth (**OR=1.88**, 95%CI:1.04,  
231 3.38) and greater parity (**OR=1.90**, 95%CI:1.14, 3.19). However, when comparison involved women  
232 classified as moderate/severe anemic (<9.0g/dl) versus combined mild/no anemia, nine (9) explanatory  
233 variables were significantly associated. Women seeking ANC services at Savelugu Hospital were more  
234 likely to have moderate/severe anemia than those at the other three HFs, including Moglaa HC  
235 (**OR=0.22**, 95%CI:0.12, 0.40), Pong Tamale HC (**OR=0.37**, 95%CI:0.21, 0.66) and Savelugu RCH  
236 (**OR=0.21**, 95%CI:0.11, 0.40). Moderate/severe anemia was less frequent among women who were  
237 older (**OR=0.18**, 95%CI:0.04, 0.81). Participants who consumed vitamin A-rich fruits and vegetables  
238 were less likely to have moderate/severe anemia than those who did not consume (**OR=0.46**,  
239 95%CI:0.22, 0.97). Similarly, women who received deworming medication were at lower risk to have  
240 moderate/severe anemia than those who did not receive (**OR=0.48**, 95%CI:0.28, 0.83). Interestingly,  
241 moderate/severe anemia was more likely among women who were engaged in other occupations (e.g.  
242 herdsmen) (**OR=3.76**, 95%CI:1.42, 9.94), or who consumed pulses (**OR=1.58**, 95%CI:1.06, 2.32).

243       The relationship between malaria and anemia was linked with both household ownership of an  
244 ITN and reported sleeping under an ITN. Women who did not own ITN were more than twice as likely  
245 to be moderate/severe anemic (**OR=2.06**, 95%CI:1.18, 3.60), while women who reported not sleeping  
246 under an ITN the previous night had almost twice the risk of being moderate/severe anemic (**OR=1.75**,  
247 95%CI:1.14, 2.69). Those women who had not previously delivered were more than twice as likely to  
248 be moderate/severe anemic compared to women with one or more births (**OR=2.41**, 95%CI:1.55, 3.77).  
249 None of the remaining hypothesized risk factors, such as socioeconomic status, minimum dietary

250 diversity, gestational age, and number of ANC visits, were significantly associated with  
251 moderate/severe anemia.



252  
253**Table 2: Bivariate odd ratios for anemia status among pregnant women in Northern Ghana (n=601)**

|                              | Frequency | Anemia (<11.0g/dl) | No anemia (≥11.0g/dl) | Anemia (<11.0g/dl) versus no anemia (≥11.0g/dl) |              | Moderate/severe anemia (<9.0g/dl) | Mild/no anemia (≥9.0g/dl) | Moderate severe anemia (<9.0g/dl) versus mild/no anemia (≥9.0g/dl) |                  |
|------------------------------|-----------|--------------------|-----------------------|-------------------------------------------------|--------------|-----------------------------------|---------------------------|--------------------------------------------------------------------|------------------|
|                              |           | %                  | %                     | unadjusted OR(CI)                               | P-value      | %                                 | %                         | unadjusted OR(CI)                                                  | P-value          |
| <b>Health Facility</b>       |           |                    |                       |                                                 |              |                                   |                           |                                                                    |                  |
| Savelugu hospital            | 349       | 75.9               | 24.1                  | Ref                                             |              | 45.0                              | 55.0                      | Ref                                                                |                  |
| Moglaa HC                    | 93        | 73.1               | 26.9                  | 0.86(0.51, 1.45)                                | 0.576        | 15.1                              | 84.9                      | 0.22(0.12, 0.40)                                                   | <b>&lt;0.001</b> |
| Pong Tamale HC               | 77        | 80.5               | 19.5                  | 1.31(0.71, 2.42)                                | 0.389        | 23.4                              | 76.6                      | 0.37(0.21, 0.66)                                                   | <b>0.001</b>     |
| Savelugu RCH                 | 82        | 67.1               | 32.9                  | 0.65(0.38, 1.09)                                | 0.100        | 14.6                              | 85.4                      | 0.21(0.11, 0.40)                                                   | <b>&lt;0.001</b> |
| <b>Age (in years)</b>        |           |                    |                       |                                                 |              |                                   |                           |                                                                    |                  |
| <20                          | 34        | 85.3               | 14.7                  | 2.01(0.75, 5.36)                                | 0.164        | 41.2                              | 58.8                      | 1.29 (0.63, 2.66)                                                  | 0.484            |
| 20-29                        | 319       | 74.3               | 25.7                  | Ref                                             |              | 35.1                              | 64.9                      | Ref                                                                |                  |
| 30-39                        | 226       | 74.3               | 25.7                  | 1.00(0.68, 1.48)                                | 0.991        | 32.3                              | 67.7                      | 0.88(0.61, 1.27)                                                   | 0.495            |
| ≥40                          | 22        | 72.7               | 27.3                  | 0.92(0.35, 2.44)                                | 0.871        | 9.1                               | 90.9                      | 0.18(0.04, 0.81)                                                   | <b>0.025</b>     |
| <b>Ethnicity</b>             |           |                    |                       |                                                 |              |                                   |                           |                                                                    |                  |
| Dagomba                      | 576       | 74.8               | 25.2                  | Ref                                             |              | 33.8                              | 66.2                      | Ref                                                                |                  |
| Fulani                       | 8         | 87.5               | 12.5                  | 2.35(0.28, 19.30)                               | 0.425        | 25.0                              | 75.0                      | 0.65(0.13, 3.26)                                                   | 0.602            |
| Others (e.g. Akan, Ewe etc.) | 15        | 66.7               | 33.3                  | 0.67(0.23, 2.00)                                | 0.476        | 20.0                              | 80.0                      | 0.49(0.14, 1.75)                                                   | 0.271            |
| <b>Education status</b>      |           |                    |                       |                                                 |              |                                   |                           |                                                                    |                  |
| None                         | 450       | 76.2               | 23.8                  | Ref                                             |              | 30.9                              | 69.1                      | Ref                                                                |                  |
| Primary                      | 46        | 76.1               | 23.9                  | 0.99(0.49, 2.02)                                | 0.984        | 41.3                              | 58.7                      | 1.57(0.85, 2.93)                                                   | 0.151            |
| JSS/Middle School            | 53        | 69.8               | 30.2                  | 0.72(0.39, 1.35)                                | 0.306        | 41.5                              | 58.5                      | 1.59(0.89, 2.84)                                                   | 0.119            |
| Senior Secondary             | 38        | 73.7               | 26.3                  | 0.87(0.41, 1.86)                                | 0.725        | 44.7                              | 55.3                      | 1.81(0.93, 3.54)                                                   | 0.082            |
| Tertiary                     | 14        | 50.0               | 50.0                  | 0.31(0.11, 0.91)                                | <b>0.033</b> | 28.6                              | 71.4                      | 0.89(0.28, 2.90)                                                   | 0.853            |
| <b>Occupation status</b>     |           |                    |                       |                                                 |              |                                   |                           |                                                                    |                  |
| Farmer                       | 233       | 77.7               | 22.3                  | Ref                                             |              | 31.3                              | 68.7                      | Ref                                                                |                  |
| Petty trader                 | 181       | 70.2               | 29.8                  | 0.68 (0.43, 1.05)                               | 0.083        | 29.8                              | 70.2                      | 0.93(0.61, 1.42)                                                   | 0.743            |
| Salaried worker              | 14        | 57.1               | 42.9                  | 0.38(0.13, 1.15)                                | 0.088        | 28.6                              | 71.4                      | 0.88(0.27, 2.89)                                                   | 0.829            |
| Artisan/laborer              | 79        | 77.2               | 22.8                  | 0.97(0.53, 1.79)                                | 0.931        | 34.2                              | 65.8                      | 1.14(0.66, 1.96)                                                   | 0.640            |
| No occupation                | 75        | 77.3               | 22.7                  | 0.98(0.53, 1.83)                                | 0.950        | 41.3                              | 58.7                      | 1.54(0.90, 2.64)                                                   | 0.112            |
| Others                       | 19        | 78.9               | 21.1                  | 1.08(0.34, 3.39)                                | 0.899        | 63.2                              | 36.8                      | 3.76(1.42, 9.94)                                                   | <b>0.008</b>     |
| <b>Wealth index</b>          |           |                    |                       |                                                 |              |                                   |                           |                                                                    |                  |
| Poorest                      | 118       | 73.7               | 26.3                  | 1.32(0.75, 2.31)                                | 0.332        | 28.8                              | 71.2                      | 0.89(0.51, 1.56)                                                   | 0.693            |

|                                               |     |      |      |                   |              |      |      |                  |              |
|-----------------------------------------------|-----|------|------|-------------------|--------------|------|------|------------------|--------------|
| Poor                                          | 119 | 76.5 | 23.5 | 1.53(0.86, 2.70)  | 0.145        | 34.5 | 65.5 | 1.16(0.68, 1.99) | 0.585        |
| Medium                                        | 120 | 80.0 | 20.0 | 1.88(1.04, 3.38)  | <b>0.035</b> | 37.5 | 62.5 | 1.33(0.78, 2.26) | 0.298        |
| Wealthy                                       | 122 | 68.0 | 32.0 | Ref               |              | 31.2 | 68.8 | Ref              |              |
| Wealthiest                                    | 122 | 76.2 | 23.8 | 1.51(0.86, 2.65)  | 0.154        | 35.3 | 64.7 | 1.20(0.71, 2.05) | 0.497        |
| <b>Gestational age (in weeks)</b>             |     |      |      |                   |              |      |      |                  |              |
| 20-27                                         | 11  | 72.7 | 27.3 | 0.88(0.23,3.37)   | 0.855        | 36.4 | 63.6 | 1.15(0.33, 3.97) | 0.830        |
| 28-36                                         | 547 | 75.1 | 24.9 | Ref               |              | 33.3 | 66.7 | Ref              |              |
| ≥37                                           | 43  | 72.1 | 27.9 | 0.85(0.43, 1.71)  | 0.658        | 34.9 | 65.1 | 1.07(0.56, 2.06) | 0.829        |
| <b>Drinking water source</b>                  |     |      |      |                   |              |      |      |                  |              |
| Non-improved                                  | 48  | 77.1 | 22.9 | 1.14(0.57, 2.30)  | 0.713        | 25.0 | 75.0 | 0.64(0.33, 1.26) | 0.199        |
| Improved                                      | 553 | 74.7 | 25.3 | Ref               |              | 34.2 | 65.8 | Ref              |              |
| <b>Toilet facility</b>                        |     |      |      |                   |              |      |      |                  |              |
| Non-improved                                  | 457 | 74.4 | 25.6 | Ref               |              | 33.9 | 66.1 | Ref              |              |
| Improved                                      | 144 | 76.4 | 23.6 | 1.11(0.72, 1.73)  | 0.631        | 31.9 | 68.1 | 0.91(0.61, 1.36) | 0.662        |
| <b>Pulses</b>                                 |     |      |      |                   |              |      |      |                  |              |
| No                                            | 452 | 73.7 | 26.3 | Ref               |              | 30.7 | 69.3 | Ref              |              |
| Yes                                           | 148 | 78.4 | 21.6 | 1.30 (0.83, 2.02) | 0.253        | 41.2 | 58.8 | 1.58(1.06, 2.32) | <b>0.020</b> |
| <b>Nuts/seeds</b>                             |     |      |      |                   |              |      |      |                  |              |
| No                                            | 133 | 75.9 | 24.1 | 1.08(0.69, 1.69)  | 0.739        | 36.1 | 63.9 | 1.16(0.77, 1.73) | 0.473        |
| Yes                                           | 467 | 74.5 | 25.5 | Ref               |              | 32.8 | 67.2 | Ref              |              |
| <b>Dairy</b>                                  |     |      |      |                   |              |      |      |                  |              |
| No                                            | 477 | 74.4 | 25.6 | Ref               |              | 33.1 | 66.9 | Ref              |              |
| Yes                                           | 124 | 76.6 | 23.4 | 1.13 (0.71, 1.79) | 0.617        | 34.7 | 65.3 | 1.07(0.71, 1.62) | 0.744        |
| <b>Meat/poultry/fish(amaani)</b>              |     |      |      |                   |              |      |      |                  |              |
| No                                            | 7   | 71.4 | 28.6 | 0.84(0.16, 4.36)  | 0.833        | 28.6 | 71.4 | 0.79(0.15, 4.13) | 0.784        |
| Yes                                           | 594 | 74.9 | 25.1 | Ref               |              | 33.5 | 66.5 | Ref              |              |
| <b>Eggs</b>                                   |     |      |      |                   |              |      |      |                  |              |
| No                                            | 555 | 75.3 | 24.7 | Ref               |              | 33.3 | 66.7 | Ref              |              |
| Yes                                           | 45  | 71.1 | 28.9 | 0.81(0.41, 1.58)  | 0.532        | 35.6 | 64.4 | 1.10(0.58, 2.08) | 0.761        |
| <b>Dark green leafy vegetables</b>            |     |      |      |                   |              |      |      |                  |              |
| No                                            | 40  | 80.0 | 20.0 | 1.37(0.62, 3.04)  | 0.441        | 25.0 | 75.0 | 0.65(0.31, 1.35) | 0.245        |
| Yes                                           | 561 | 74.5 | 25.5 | Ref               |              | 34.1 | 65.9 | Ref              |              |
| <b>Vitamin A-rich fruits &amp; vegetables</b> |     |      |      |                   |              |      |      |                  |              |
| No                                            | 555 | 74.8 | 25.3 | Ref               |              | 34.6 | 65.4 | Ref              |              |

|                                       |     |      |      |                  |              |       |       |                  |                  |
|---------------------------------------|-----|------|------|------------------|--------------|-------|-------|------------------|------------------|
| Yes                                   | 46  | 76.1 | 23.9 | 1.07(0.53, 2.17) | 0.844        | 19.6  | 80.4  | 0.46(0.22, 0.97) | <b>0.042</b>     |
| <b>Other vegetables</b>               |     |      |      |                  |              |       |       |                  |                  |
| No                                    | 11  | 81.8 | 18.2 | 1.52(0.32, 7.12) | 0.595        | 27.3  | 72.7  | 0.74(0.19, 2.83) | 0.663            |
| Yes                                   | 590 | 74.7 | 25.3 | Ref              |              | 33.6  | 66.4  | Ref              |                  |
| <b>Other fruits</b>                   |     |      |      |                  |              |       |       |                  |                  |
| No                                    | 570 | 74.6 | 25.4 | Ref              |              | 33.5  | 66.5  | Ref              |                  |
| Yes                                   | 30  | 80.0 | 20.0 | 1.36(0.54, 3.40) | 0.505        | 30.0  | 70.0  | 0.85(0.38, 1.89) | 0.691            |
| <b>Dietary diversity</b>              |     |      |      |                  |              |       |       |                  |                  |
| <5                                    | 91  | 73.6 | 26.4 | 0.93(0.56, 1.54) | 0.766        | 29.7  | 70.3  | 0.81(0.50, 1.32) | 0.408            |
| ≥5                                    | 510 | 75.1 | 24.9 | Ref              |              | 34.1  | 65.9  | Ref              |                  |
| <b>Household livestock</b>            |     |      |      |                  |              |       |       |                  |                  |
| No                                    | 116 | 69.8 | 30.2 | 0.73(0.46, 1.14) | 0.164        | 31.0  | 69.0  | 0.87(0.56, 1.35) | 0.540            |
| Yes                                   | 485 | 76.1 | 23.9 | Ref              |              | 34.0  | 66.0  | Ref              |                  |
| <b>Household ITN</b>                  |     |      |      |                  |              |       |       |                  |                  |
| No                                    | 55  | 80.0 | 20.0 | 1.38(0.69, 2.74) | 0.360        | 49.1  | 50.9  | 2.06(1.18, 3.60) | <b>0.011</b>     |
| Yes                                   | 546 | 74.4 | 25.6 | Ref              |              | 31.9  | 68.1  | Ref              |                  |
| <b>Slept under ITN previous night</b> |     |      |      |                  |              |       |       |                  |                  |
| No                                    | 104 | 77.9 | 22.1 | 1.22(0.74, 2.02) | 0.437        | 44.2  | 55.8  | 1.75(1.14, 2.69) | <b>0.011</b>     |
| Yes                                   | 497 | 74.3 | 25.7 | Ref              |              | 31.2  | 68.8  | Ref              |                  |
| <b>No. of previous deliveries</b>     |     |      |      |                  |              |       |       |                  |                  |
| 0                                     | 142 | 81.7 | 18.3 | 1.90(1.14, 3.19) | <b>0.015</b> | 47.9  | 52.1  | 2.41(1.55, 3.77) | <b>&lt;0.001</b> |
| 1                                     | 122 | 77.1 | 22.9 | 1.43(0.86, 2.39) | 0.170        | 32.8  | 67.2  | 1.28(0.79, 2.08) | 0.314            |
| 2-3                                   | 214 | 70.1 | 29.9 | Ref              |              | 27.6  | 72.4  | Ref              |                  |
| ≥4                                    | 123 | 73.2 | 26.8 | 1.16(0.71, 1.91) | 0.548        | 27.64 | 72.36 | 1.00(0.61, 1.65) | 0.989            |
| <b>Total ANC visits</b>               |     |      |      |                  |              |       |       |                  |                  |
| < 4                                   | 286 | 76.9 | 23.1 | Ref              |              | 33.9  | 66.1  | Ref              |                  |
| 4-7                                   | 286 | 72.4 | 27.6 | 0.79(0.54, 1.15) | 0.212        | 33.6  | 66.4  | 0.98(0.70, 1.39) | 0.930            |
| ≥8                                    | 29  | 79.3 | 20.7 | 1.15(0.45, 2.94) | 0.771        | 27.6  | 72.4  | 0.74(0.32, 1.74) | 0.492            |
| <b>IPT received</b>                   |     |      |      |                  |              |       |       |                  |                  |
| No                                    | 99  | 79.8 | 20.2 | 1.39(0.82, 2.37) | 0.218        | 41.4  | 58.6  | 1.51(0.97, 2.35) | 0.067            |
| Yes                                   | 502 | 73.9 | 26.1 | Ref              |              | 31.9  | 68.1  | Ref              |                  |
| <b>Deworming medication</b>           |     |      |      |                  |              |       |       |                  |                  |
| No                                    | 515 | 74.0 | 26.0 | Ref              |              | 35.5  | 64.5  | Ref              |                  |
| Yes                                   | 86  | 80.2 | 19.8 | 1.43(0.81, 2.51) | 0.218        | 20.9  | 79.1  | 0.48(0.28, 0.83) | <b>0.009</b>     |

255 In adjusted logistic regression models that included statistically significant risk factors from  
256 bivariate analysis (**Table 3**), tertiary education (**aOR=0.20**, 95%CI:0.04, 0.96) and no previous delivery  
257 (**aOR=2.13**, 95%CI:1.18, 3.85) were the only two factors that were significantly associated with anemia  
258 (<11.0g/dl) (**Table 3**). The current study found that maternal dietary diversity (<5 MDD-W) was not  
259 statistically associated with anemia (aOR=0.80, 95%CI:0.67, 1.38) or moderate/severe anemia  
260 (aOR=0.74, 95%CI:0.44, 1.24). However, in using moderate/severe anemia (<9.0g/dl) as the cut-off  
261 point for anemia, three explanatory factors were significantly associated. That is, participants whose  
262 occupation status was categorized as "other" (e.g. herdsmen) were three times more likely to have  
263 moderate/severe anemia (**aOR=2.90**, 95%CI: 1.04, 8.09). Women who had no previous delivery  
264 continued to be more likely to have moderate/severe anemia (**aOR=2.13**, 95%CI: 1.28, 3.54). Finally,  
265 participants who received deworming medication remained at lower risk of moderate/severe anemia  
266 (**aOR=0.51**, 95%CI:0.29, 0.90) than those who did not take these medications.

267

**Table 3: Multivariate analysis of anemia status among pregnant women in Northern Ghana (n=601)**

|                                       |           | Anemia (<11.0g/dl) | No anemia (≥11.0g/dl) | Anemia (<11.0g/dl) versus no anemia (≥11.0g/dl) |              | Moderate/severe anemia (<9.0g/dl) | Mild/no anemia (≥9.0g/dl) | Moderate/severe anemia (<9.0g/dl) versus mild/no anemia (≥9.0g/dl) |              |
|---------------------------------------|-----------|--------------------|-----------------------|-------------------------------------------------|--------------|-----------------------------------|---------------------------|--------------------------------------------------------------------|--------------|
|                                       | Frequency | %                  | %                     | Adjusted OR(CI)                                 | P-value      | %                                 | %                         | Adjusted OR(CI)                                                    | P-value      |
| <b>Education status</b>               |           |                    |                       |                                                 |              |                                   |                           |                                                                    |              |
| None                                  | 450       | 76.2               | 23.8                  | Ref                                             |              | 30.9                              | 69.1                      | Ref                                                                |              |
| Primary                               | 46        | 76.1               | 23.9                  | 0.96(0.45, 2.03)                                | 0.908        | 41.3                              | 58.7                      | 1.48(0.76, 2.88)                                                   | 0.253        |
| JSS/Middle School                     | 53        | 69.8               | 30.2                  | 0.59(0.30, 1.18)                                | 0.135        | 41.5                              | 58.5                      | 1.31(0.69, 2.49)                                                   | 0.407        |
| Senior Secondary                      | 38        | 73.7               | 26.3                  | 0.64(0.27, 1.52)                                | 0.312        | 44.7                              | 55.3                      | 1.19(0.54, 2.62)                                                   | 0.657        |
| Tertiary                              | 14        | 50.00              | 50.00                 | <b>0.20</b> (0.04, 0.96)                        | <b>0.044</b> | 28.6                              | 71.4                      | 0.75(0.15, 3.71)                                                   | 0.723        |
| <b>Occupation status</b>              |           |                    |                       |                                                 |              |                                   |                           |                                                                    |              |
| Farmer                                | 233       | 77.7               | 22.3                  | Ref                                             |              | 31.3                              | 68.7                      | Ref                                                                |              |
| Petty trader                          | 181       | 70.2               | 29.8                  | 0.72(0.45, 1.17)                                | 0.185        | 29.8                              | 70.2                      | 0.95(0.60, 1.51)                                                   | 0.840        |
| Salaried worker                       | 14        | 57.1               | 42.9                  | 0.85(0.16, 4.46)                                | 0.852        | 28.6                              | 71.4                      | 0.95(0.19, 4.72)                                                   | 0.948        |
| Artisan/laborer                       | 79        | 77.2               | 22.8                  | 0.95(0.48, 1.89)                                | 0.874        | 34.2                              | 65.8                      | 0.83(0.45, 1.53)                                                   | 0.549        |
| No occupation                         | 75        | 77.3               | 22.7                  | 0.93(0.47, 1.86)                                | 0.844        | 41.3                              | 58.7                      | 1.32(0.72, 2.41)                                                   | 0.367        |
| Others                                | 19        | 78.9               | 21.1                  | 1.17(0.35, 3.87)                                | 0.797        | 63.2                              | 36.8                      | <b>2.90</b> (1.04, 8.09)                                           | <b>0.042</b> |
| <b>Wealth index</b>                   |           |                    |                       |                                                 |              |                                   |                           |                                                                    |              |
| Poorest                               | 118       | 73.7               | 26.3                  | 1.14(0.62, 2.08)                                | 0.676        | 28.8                              | 71.2                      | 0.96(0.52, 1.75)                                                   | 0.893        |
| Poor                                  | 119       | 76.5               | 23.5                  | 1.40(0.77, 2.54)                                | 0.277        | 34.5                              | 65.5                      | 1.33(0.74, 2.38)                                                   | 0.337        |
| Medium                                | 120       | 80.0               | 20.0                  | 1.80(0.98, 3.31)                                | 0.059        | 37.5                              | 62.5                      | 1.46(0.83, 2.57)                                                   | 0.191        |
| Wealthy                               | 122       | 68.0               | 32.0                  | Ref                                             |              | 31.2                              | 68.8                      | Ref                                                                |              |
| Wealthiest                            | 122       | 76.2               | 23.8                  | 1.65(0.90, 3.01)                                | 0.102        | 35.3                              | 64.7                      | 1.20(0.68, 2.12)                                                   | 0.533        |
| <b>Gestational age (in weeks)</b>     |           |                    |                       |                                                 |              |                                   |                           |                                                                    |              |
| 20-27                                 | 11        | 72.7               | 27.3                  | 1.17(0.28, 4.89)                                | 0.830        | 36.4                              | 63.6                      | 1.23(0.34, 4.54)                                                   | 0.752        |
| 28-36                                 | 547       | 75.1               | 24.9                  | Ref                                             |              | 33.3                              | 66.7                      | Ref                                                                |              |
| ≥37                                   | 43        | 72.1               | 27.9                  | 0.63(0.28, 1.41)                                | 0.261        | 34.9                              | 65.1                      | 1.25(0.58, 2.68)                                                   | 0.572        |
| <b>Dietary diversity</b>              |           |                    |                       |                                                 |              |                                   |                           |                                                                    |              |
| <5                                    | 91        | 73.6               | 26.4                  | 0.80(0.47, 1.38)                                | 0.427        | 29.7                              | 70.3                      | 0.74(0.44, 1.24)                                                   | 0.249        |
| ≥5                                    | 510       | 75.1               | 24.9                  | Ref                                             |              | 34.1                              | 65.9                      | Ref                                                                |              |
| <b>Slept under ITN previous night</b> |           |                    |                       |                                                 |              |                                   |                           |                                                                    |              |
| No                                    | 104       | 77.9               | 22.1                  | 1.15(0.67, 1.96)                                | 0.621        | 44.2                              | 55.8                      | 1.48(0.93, 2.35)                                                   | 0.101        |
| Yes                                   | 497       | 74.3               | 25.7                  | Ref                                             |              | 31.2                              | 68.8                      | Ref                                                                |              |

|                                   |     |      |      |                          |              |      |      |                          |              |
|-----------------------------------|-----|------|------|--------------------------|--------------|------|------|--------------------------|--------------|
| <b>No. of previous deliveries</b> |     |      |      |                          |              |      |      |                          |              |
| 0                                 | 142 | 81.7 | 18.3 | <b>2.13</b> (1.18, 3.85) | <b>0.012</b> | 47.9 | 52.1 | <b>2.13</b> (1.28, 3.54) | <b>0.004</b> |
| 1                                 | 122 | 77.1 | 22.9 | 1.57(0.89, 2.75)         | 0.116        | 32.8 | 67.2 | 1.21(0.72, 2.03)         | 0.477        |
| 2-3                               | 214 | 70.1 | 29.9 | Ref                      |              | 27.6 | 72.4 | Ref                      |              |
| ≥4                                | 123 | 73.2 | 26.8 | 1.10(0.65, 1.84)         | 0.728        | 27.6 | 72.4 | 0.97(0.58, 1.64)         | 0.916        |
| <b>Total ANC visits</b>           |     |      |      |                          |              |      |      |                          |              |
| < 4                               | 286 | 76.9 | 23.1 | Ref                      |              | 33.9 | 66.1 | Ref                      |              |
| 4-7                               | 286 | 72.4 | 27.6 | 0.91(0.61, 1.38)         | 0.663        | 33.6 | 66.4 | 1.12(0.76, 1.64)         | 0.564        |
| ≥8                                | 29  | 79.3 | 20.7 | 1.91(0.64, 5.74)         | 0.248        | 27.6 | 72.4 | 0.88(0.32,2.37)          | 0.795        |
| <b>IPT received</b>               |     |      |      |                          |              |      |      |                          |              |
| No                                | 99  | 79.8 | 20.2 | 1.26(0.72, 2.19)         | 0.424        | 41.4 | 58.6 | 1.54(0.95, 2.48)         | 0.080        |
| Yes                               | 502 | 73.9 | 26.1 | Ref                      |              | 31.9 | 68.1 | Ref                      |              |
| <b>Deworming medication</b>       |     |      |      |                          |              |      |      |                          |              |
| No                                | 515 | 74.0 | 26.0 | Ref                      |              | 35.5 | 64.5 | Ref                      |              |
| Yes                               | 86  | 80.2 | 19.8 | 1.53(0.85, 2.76)         | 0.158        | 20.9 | 79.1 | <b>0.51</b> (0.29, 0.90) | <b>0.021</b> |

270

## 271 DISCUSSION

272 We sought to assess the independent contributions of dietary diversity and other predictors to  
273 anemia status during pregnancy. Three-quarters of women were anemic (<11.0g/dl), including one-third  
274 of whom had moderate/severe anemia. This prevalence of anemia in our study area is considered by  
275 WHO to be a severe public health problem <sup>3</sup>, and is higher than that for Ghana as a whole, and for the  
276 Africa region. Indeed, this anemia prevalence is considerably higher than the 44.6% reported in the 2014  
277 Ghana Demographic and Health Survey (GDHS) report. Other studies of pregnant women indicated  
278 anemia prevalences of 70.0% in northern Ghana, 62.6% in Southern Ghana and 51.9%-to-59.6% in  
279 Africa <sup>3,7,20,21,22</sup>. Not surprisingly, anemia prevalence among pregnant women varies by geographical  
280 area, culture, seasonality and countries <sup>23</sup> such as 75% in the current study, compared with 18% and 57%  
281 in Ethiopia <sup>24,25</sup>. The high prevalence that we observed might be due to increased physiological demands  
282 for nutrients during the second and third trimesters of pregnancy <sup>26</sup>. It could also be attributed to  
283 increased demand for iron by the growing fetus, particularly during the last trimester of pregnancy <sup>27</sup>. In  
284 addition to these possible explanations, the specific causes underlying the high anemia prevalence in the  
285 study setting might be attributed to the geographical area and cultural preferences, as was seen in  
286 northern Ghana with prevalences of 47% mild, 20% moderate, and 3% severe <sup>10</sup>.

287 In bivariate analysis, some socio-demographic factors (e.g. older age) were associated with lower  
288 odds of moderate/severe anemia among pregnant women, while others such as occupation (e.g.  
289 herdsmen) and parity (primigravidae) were associated with higher odds of moderate/severe anemia. Our  
290 finding that increased age and greater parity were associated with lower risk of moderate/severe anemia  
291 may be due to the experience acquired by women during previous pregnancies and with ANC services,  
292 for example in the use of ITN and IPT. A similar study conducted in northern Ghana also found that  
293 increased parity was associated with reduced anemia, – ranging from 75.0% anemia among  
294 primigravidae to 43.7% among multigravidae <sup>20</sup>. Also, another investigation in southern Ghana reported

295 mean Hb concentrations of 9.7g/dl for primigravidae, 10.1g/dl for secundigravidae and 10.5g/dl for  
296 multigravidae<sup>28</sup>. However, other studies have found that higher parity (multigravidae) was associated  
297 with greater risk of anemia<sup>25,29,30,31</sup>. This might be due to differences in birth spacing rather than total  
298 parity. For example, pregnant women with short pregnancy intervals were more likely to develop anemia  
299 during pregnancy than those with longer birth spacing<sup>27</sup>.

300 Our results indicated that pregnant women who worked in other occupations (e.g. herdsmen)  
301 were at greater risk of moderate/severe anemia. Usually, these families live in the peripheral settings  
302 of rural Ghana communities, and therefore have reduced access to health facilities. In addition, they are  
303 often from minority ethnic groups, hence are more likely to delay ANC initiation until second or third  
304 trimester of pregnancy. Thus, they fail to exploit all opportunities offered by the ANC<sup>32</sup>. Salaried  
305 workers and traders had lower odds of moderate/severe anemia when compared to farmers. This may be  
306 due to their increased access to food, greater dietary diversity and improved food security compared to  
307 farmers, for example, whose livelihood depends on seasonal crops to meet their nutrient requirements.

308 Greater parity was associated with lower odds of moderate/severe anemia in multivariable  
309 analyses (Table 3). Specifically, first-time pregnant women were more than twice as likely to be  
310 moderate/severe anemic. This is consistent with previous studies where primigravidae had increased risk  
311 of anemia compared to multigravidae<sup>12</sup>. Until uncertain rituals are performed by the family members of  
312 the husband to publicly declare or announce the pregnancy, they are unwilling to start ANC visits for  
313 fear of miscarriage or other complications.

314 Dietary diversity may be an indicator of food access and use, and of diet quality. We observed  
315 that after controlling for potential confounding factors (maternal education, occupation, wealth index,  
316 ITN ownership and utilization, parity, ANC attendance, IPT and deworming medication) in multivariate  
317 logistic regression model, achieving the MDD-W indicator was not associated with moderate/severe  
318 anemia. Previous research in Ghana found consumption of other fruits or and seeds/nuts was statistically



319 associated with anemia and MDD-W was not associated with anemia <sup>10</sup>, but another study found that  
320 high maternal MDD-W was associated with a decreased risk of anemia <sup>20</sup>. Diet is an important factor for  
321 anemia. Some eating patterns or habits may predispose pregnant women to an increased risk of  
322 developing anemia. Poor dietary diversity leads to inadequacies in minerals and vitamins. Though we  
323 observed that 85% of the pregnant women consumed  $\geq 5$  food groups in the previous day, dietary  
324 diversity was not associated with a higher Hb concentration. This lack of association between MDD-W  
325 and moderate/severe anemia may be due to inappropriate kinds of foods (i.e. animal-source foods with  
326 highly bioavailable iron) that would be linked to lower anemia risk or challenges of nutrients  
327 bioavailability from the consumed diets. We also found that consumption of animal-source foods was  
328 not associated with lower odds of anemia in the current study.

329 Overall, 91% of pregnant women reported of ITN ownership and 83% slept under the ITN the  
330 night before the interview. The coverage and utilization of ITN higher than a previous study conducted  
331 in southern Ghana where 75% of pregnant women reported ownership of ITN and only 49% slept under  
332 it the night preceding enrolment <sup>33</sup>. Similarly, the coverage of at least one IPT dose (84%) in the current  
333 study exceeds the national average (68%) <sup>33</sup>. Independent of malaria interventions (household ownership  
334 of ITN and slept under ITN on previous night),  $\geq 4$  ANC visits and deworming medication were  
335 associated with lower odds of moderate/severe anemia among pregnant women aged  $\geq 20$  weeks of  
336 gestation. In our study, deworming medication was protective against moderate/severe anemia. This  
337 varies from the a previous study which reported that iron supplementation and deworming treatment was  
338 not significant associated with anemia <sup>30</sup>. We observed that pregnant women who received IPT (83%)  
339 had lesser of risk to develop moderate/severe anemia. An explanatory factor such as IPT was not  
340 associated with moderate/severe anemia. Our current finding is similar to a study conducted in Ghana  
341 which found that IPT shown a weak association with anemia using bivariate analysis but no association  
342 when adjusted for confounders in multivariate analysis <sup>20</sup>. In a previous study conducted in Ethiopia,

343 malaria infection during pregnancy had higher risk to develop anemia<sup>27</sup>. Our study found that ownership  
344 of ITN and utilization of ITN were associated with reduced odds of moderate/severe anemia. This is  
345 suggestive of effective intervention in the study area. Deworming medication was associated with  
346 moderate/severe anemia. Parasitic infections are known to be a major cause of anemia. Thus, treatment  
347 against intestinal parasites help to improve hemoglobin concentration<sup>3</sup>.

348

## 349 **Strengths and Limitations**

350 In terms of strength, the study focused on an important category of pregnant women with  
351 implications on birth outcomes. The sample size was also large and representative of the population  
352 accessing ANC services at HFs. This is probably the first study to assess the predictors of  
353 moderate/severe anemia among pregnant women ( $\geq 20$  gestational weeks) in northern Ghana.

354 This study had several limitations and the findings should be interpreted as such. The study  
355 design was cross-sectional and does not allow us to assess causality. In addition, participant recall bias  
356 was a limitation but the interviews were conducted using a structured questionnaire and the interviewers  
357 were trained nurses and health science educators to mitigate the effect of recall bias. The study sample  
358 was limited to pregnant women who received ANC services at HFs, thus, some pregnant women were  
359 excluded. This may not be reflective of the study setting. However, the majority of Ghanaian women  
360 now seek ANC services.

361

## 362 **CONCLUSION**

363 The prevalence of anemia among pregnant women was nearly twice as national estimate in  
364 Ghana, and varied by maternal age, parity and occupation. Minimum dietary diversity was not associated  
365 to moderate/severe anemia. Household ownership of ITN, use of ITN and deworming medication were

366 associated with moderate/severe anemia. There is the need to intensify education on ANC services, ITN  
367 utilization and deworming medication to prevent and reduce anemia prevalence among pregnant women.

368

### 369 **Acknowledgements**

370 We are grateful to the two research assistants and staff of Ghana Health Service who  
371 participated in the data collection. In addition, we acknowledge financial support from PARTNER II  
372 through funding from the Fogarty International Center of US National Institutes of Health  
373 (D43TW009353).

374

### 375 **Data Availability Statement**

376 The dataset used and/or analyzed during the study is available from the corresponding  
377 author upon request.

### 378 **Author contributions**

379 MNA and MW conceptualized and designed the protocol and received support from AJ  
380 and RA. MW and RA supervised the implementation of the study. MNA and MY conducted the study.  
381 MNA and MW drafted the manuscript. RA, AJ and MY edited the manuscript. All authors read and  
382 approved the final manuscript.

383

### 384 **REFERENCES**

385

- 386 1. Kassa, G. M., Muche, A. A., Berhe, A. K. & Fekadu, G. A. Prevalence and determinants of anemia  
387 among pregnant women in Ethiopia ; a systematic review and meta-analysis. 1–9 (2017).  
388 doi:10.1186/s12878-017-0090-z
- 389 2. Black, R. E. *et al.* Maternal and Child Nutrition 1 Maternal and child undernutrition and overweight in  
390 low-income and middle-income countries. (2011). doi:10.1016/S0140-6736(13)60937-X
- 391 3. WHO. *The global prevalence of anaemia in 2011*. Geneva: World Health Organization. *WHO Report*  
392 (2015). doi:10.1017/S1368980008002401
- 393 4. Engmann, C., Adanu, R., Lu, T., Bose, C. & Lozoff, B. Anemia and iron deficiency in pregnant  
394 Ghanaian women from urban areas. 62–66 (2008). doi:10.1016/j.ijgo.2007.09.032
- 395 5. WHO. WHO Recommendation on Antenatal care for positive pregnancy experience. *WHO Recomm.*  
396 *Antenatal care Posit. pregnancy Exp.* (2016).

- 397 6. Tadesse, S. E. *et al.* Determinants of anemia among pregnant mothers attending antenatal care in Dessie  
398 town health facilities , northern central Ethiopia , unmatched case -control study. 1–9 (2017).  
399 doi:10.1371/journal.pone.0173173
- 400 7. GSS, GHS & ICF. International. *Ghana Demographic and Health Survey 2014*. Rockville, Maryland,  
401 USA: Ghana Statitiscal Service, Ghana Health Service, and ICF International. (2015).
- 402 8. WHO. Worldwide prevalence of anaemia 1993-2005: WHO Global Database on Anaemia. World Health  
403 Organization. (2008).
- 404 9. Ngnie-teta, I., Kuate-defo, B. & Receveur, O. Multilevel modelling of sociodemographic predictors of  
405 various levels of anaemia among women in Mali. **12**, 1462–1469 (2008).
- 406 10. Saaka, M., Oladele, J., Larbi, A. & Hoeschle-zeledon, I. Dietary Diversity Is Not Associated with  
407 Haematological Status of Pregnant Women Resident in Rural Areas of Northern Ghana. **2017**, (2017).
- 408 11. Kumar, A., Rai, A. K., Basu, S., Dash, D. & Singh, J. S. Cord Blood and Breast Milk Iron Status in. **121**,  
409 (2008).
- 410 12. Munasinghe, S. & Broek, N. Van Den. Anaemia In Pregnancy In Malawi- A Review. **18**, 160–174  
411 (2006).
- 412 13. Darnton-hill, I. & Mkparu, U. C. Micronutrients in Pregnancy in Low- and Middle-Income Countries.  
413 1744–1768 (2015). doi:10.3390/nu7031744
- 414 14. Scholl, T. O. Iron status during pregnancy : setting the stage for mother and iron deficiency in women.  
415 **81**, 1218–1222 (2018).
- 416 15. Zerfu, T. A., Umeta, M. & Baye, K. Dietary diversity during pregnancy is associated with reduced risk of  
417 maternal anemia , preterm delivery , and low birth weight in a prospective cohort study in rural Ethiopia  
418 1. **2011**, 1482–1488 (2016).
- 419 16. Ghose, B. & Yaya, S. Fruit and vegetable consumption and anemia among adult non-pregnant women :  
420 Ghana Demographic and Health Survey. 1–16 (2018). doi:10.7717/peerj.4414
- 421 17. Desta, M., Akibu, M., Tadese, M. & Tesfaye, M. Dietary Diversity and Associated Factors among  
422 Pregnant Women Attending Antenatal Clinic in Shashemane , Oromia , Central Ethiopia : A Cross-  
423 Sectional Study. **2019**, 7–10 (2019).
- 424 18. Scholl, T. O. Iron status during pregnancy: setting the stage for mother and infant. *Am J Clin Nutr* **81**,  
425 (2005).
- 426 19. FAO. *Minimum Dietary Diversity for Women A Guide to Measurement*. The Food and Agriculture  
427 Organization of the United Nations and USAID’s Food and Nutrition Technical Assistance III Project,  
428 Rome. (2016).
- 429 20. Saaka, M. & Abdul, A. Role dietary diversity in ensuring adequate haematological status during  
430 pregnancy. **4**, 749–755 (2015).
- 431 21. Tay, S. C. K., Agboli, E., Abruquah, H. H. & Walana, W. Malaria and Anaemia in Pregnant and Non-  
432 Pregnant Women of Child-Bearing Age at the University Hospital ,. **2013**, 193–200 (2013).
- 433 22. Anlaakuu, P. *et al.* Anaemia in pregnancy and associated factors : a cross sectional study of antenatal  
434 attendants at the Sunyani Municipal Hospital , Ghana. *Malar. J.* **71**, 1280–1284 (2017).
- 435 23. Chowdhury, H. A. *et al.* Factors associated with maternal anaemia among pregnant women in Dhaka  
436 city. *BMC Womens. Health* **15**, 1–6 (2015).
- 437 24. Alene, K. A., Dohe, A. M. & Mohamed Dohe, A. Prevalence of Anemia and Associated Factors among  
438 Pregnant Women in an Urban Area of Eastern Ethiopia. *Anemia* **2014**, (2015).
- 439 25. Stephen, G. *et al.* Anaemia in Pregnancy : Prevalence , Risk Factors , and Adverse Perinatal Outcomes in  
440 Northern Tanzania. **2018**, (2018).
- 441 26. Lebso, M., Anato, A. & Loha, E. Prevalence of anemia and associated factors among pregnant women in  
442 Southern Ethiopia : A community based cross-sectional study. 1–11 (2017).  
443 doi:10.1371/journal.pone.0188783
- 444 27. Kassa, G. M., Muche, A. A., Berhe, A. K. & Fekadu, G. A. Prevalence and determinants of anemia  
445 among pregnant women in Ethiopia; a systematic review and meta-analysis. *BMC Hematol.* **17**, 1–9  
446 (2017).
- 447 28. Ofori, M. F., Ansah, E., Agyepong, I., Hviid, L. & Akanmori, B. D. Pregnancy associated malaria in a  
448 rural community of Ghana. **43**, (2009).

- 449 29. Al-Shafei, M. A. *et al.* Effect of high parity on the occurrence of prediabetes: a cohort study. *Acta*  
450 *Obstet. Gynecol. Scand.* **89**, 1182–1186 (2010).
- 451 30. Zillmer, K. *et al.* Predictors of anemia in pregnant women residing in rural areas of the Oromiya region  
452 of Ethiopia. 1–8 (2017). doi:10.1186/s40795-017-0166-y
- 453 31. Dar, B. Pregnant mothers are more anemic than lactating mothers , a comparative. 1–7 (2018).  
454 doi:10.1186/s12878-018-0096-1
- 455 32. Begum, K. *et al.* Prevalence of and factors associated with antenatal care seeking and adherence to  
456 recommended iron - folic acid supplementation among pregnant women in Zinder , Niger. **14**, 1–11  
457 (2018).
- 458 33. Ampofo, G. D., Tagbor, H. & Bates, I. Effectiveness of pregnant women ’ s active participation in their  
459 antenatal care for the control of malaria and anaemia in pregnancy in Ghana : a cluster randomized  
460 controlled trial. *Malar. J.* 1–15 (2018). doi:10.1186/s12936-018-2387-1  
461  
462
